# Supplementary material for: Different Effects of sgRNA Length on CRISPR-mediated Gene Knockout Efficiency
Source: PubMed Central journal article supplement (PMC4919781; doi:10.1038/srep28566), 2016-06-24
Supplement: srep28566-s1.pdf [file srep28566-s1.pdf]

## Supplementary Information

### Different Effects of sgRNA Length on CRISPR-mediated Gene Knockout Efficiency

Jian-Ping Zhang<sup>1,2\*</sup>, Xiao-Lan Li<sup>1,2\*</sup>, Amanda Neises<sup>7</sup>, Wanqiu Chen<sup>7</sup>, Lin-Ping Hu<sup>1,2</sup>,  
Guang-Zhen Ji<sup>1,2</sup>, Jun-Yao Yu<sup>1,2</sup>, Jing Xu<sup>1,2</sup>, Wei-Ping Yuan<sup>1,2</sup>, Tao Cheng<sup>1,2,3,4,5,6</sup>, Xiao-Bing  
Zhang<sup>1,2,3,4,7</sup>

1. State Key Laboratory of Experimental Hematology;
2. Institute of Hematology and Blood Disease Hospital, Chinese Academy of Medical Sciences and Peking Union Medical College, Tianjin, China;
3. Center for Stem Cell Medicine, Chinese Academy of Medical Sciences, Tianjin, China;
4. Department of Stem Cell & Regenerative Medicine, Peking Union Medical College, Tianjin, China;
5. Collaborative Innovation Center for Cancer Medicine, Tianjin, China;
6. Tianjin Key Laboratory of Blood Cell Therapy and Technology, Tianjin, China;
7. Department of Medicine, Loma Linda University, Loma Linda, CA 92350, USA.

\*These authors contributed equally to this work.

#### Correspondences

Xiao-Bing Zhang, PhD. Division of Regenerative Medicine MC1528B, Department of Medicine, Loma Linda University. 11234 Anderson Street, Loma Linda, CA 92350. E-mail: xzhang@llu.edu. Phone: 909-651-5886. Fax: 909-558-0428.

Tao Cheng, MD. State Key Laboratory of Experimental Hematology, Institute of Hematology & Blood Diseases Hospital, Collaborative Innovation Center for Cancer Medicine, Tianjin, China; E-mail: chengtao@ihcams.ac.cn.

# Supplementary Figure S1A

## 293T cells

### *sgGFP42- 17nt sgRNA*

TGAACTTGTGGCCGTTTACGTCGCCGTCACCA<sup>1</sup>GGA<sup>1</sup>TGGGCACCACCCCGGTGAACAGCTC wild-type  
TGAACTTGTGGCCGTTTACGTCGCCGTCAGCTC-----ATGGGCACCACCCCGGTGAACAGCTC-7  
TGAACTTGTGGCCGTTTACGTCGCCGTCAGCTCGACC----GGGCACCACCCCGGTGAACAGCTC-5  
TGAACTTGTGGCCGTTTACGTCGCCGTCAGCTCGAC--GATGGGCACCACCCCGGTGAACAGCTC-3  
TGAACTTGTGGCCGTTTACGTCGCCGTCAGCTCGACC-GGATGGGCACCACCCCGGTGAACAGCTC-1  
TGAACTTGTGGCCGTTTACGTCGCCGTCAGCTCGACC-GGATGGGCACCACCCCGGTGAACAGCTC-1  
TGAACTTGTGGCCGTTTACGTCGCCGTCAGCTCGACCA<sup>1</sup>GGATGGGCACCACCCCGGTGAACAGCT +1  
TGAACTTGTGGCCGTTTACGTCGCCGTCAGCTCGAC<sup>1</sup>gacgtCAGGATGGGCACCACCCCGGTGAAC +5  
TGAACTTGTGGCCGTTTACGTCGCCGTCAGCTCGACC<sup>1</sup>ggcaccggAGGATGGGCACCACCCCGGTG +8

### *sgGFP42-20nt sgRNA*

TGAACTTGTGGCCGTTTACGTCGCCGTCACCA<sup>1</sup>GGA<sup>1</sup>TGGGCACCACCCCGGTGAACAGCTC wild-type  
TGAACTTGTGGCCG-----GGGCACCACCCCGGTGAACAGCTC -29  
TGAACTTGTGGCCGTTTACGTCGCCGTCAGCTCG-----ACCCCGGTGAACAGCTC -15  
TGAACTTGTGGCCGTTTACGTCGCCGTCAGCT-----CACCACCCCGGTGAACAGCTC -13  
TGAACTTGTGGCCGTTTACGTCGCCGTCAGCT-----CACCACCCCGGTGAACAGCTC -13  
TGAACTTGTGGCCGTTTACGTCGCCGTCAGCTCG-----ACCACCCCGGTGAACAGCTC -12  
TGAACTTGTGGCCGTTTACGTCGCCGTCAGCTC----GATGGGCACCACCCCGGTGAACAGCTC-6  
TGAACTTGTGGCCGTTTACGTCGCCGTCAGCTC----GATGGGCACCACCCCGGTGAACAGCTC-6  
TGAACTTGTGGCCGTTTACGTCGCCGTCAGCTC----GATGGGCACCACCCCGGTGAACAGCTC-6  
TGAACTTGTGGCCGTTTACGTCGCCGTCAGCTCGACCA<sup>1</sup>AGGATGGGCACCACCCCGGTGAACAGCT +1  
TGAACTTGTGGCCGTTTACGTCGCCGTCAGCTCGACCA<sup>1</sup>gacgtTGGGCACCACCCCGGTGAACA +4  
TGAACTTGTGGCCGTTTACGTCGCCGTCAGCTCGAC<sup>1</sup>gacgtCAGGATGGGCACCACCCCGGTGAAC +5  
TGAACTTGTGGCCGTTTACGTCGCCGTCAGCTCGACCA<sup>1</sup>ccccgatgaacagccGGATGGGCACCAC +15  
TGAACTTGTGGCCGTTTACGTCGCCGTCAGCTCGAC<sup>1</sup>gtccatccccgttacgtCAGGATGGGCACC +17

### *sgGFP101- 17nt sgRNA*

CAAGTTCAGCGTGTCCGGCGAGGGCGAGGGCGATGCCAC<sup>1</sup>CTA<sup>1</sup>CGGCAAGCTGACCCTGAAGTTCATC wild-type  
<-----CACCTACGGCAAGCTGACCCTGAAGTTCATC -83  
CAAGTTCAGCGTGTCCG-----> -60  
<-----ACGGCAAGCTGACCCTGAAGTTCATC -55  
CAAGTTCAGCGTGTCCGGCGAGGGCGAGGGCGAGGGC-----AAGCTGACCCTGAAGTTCATC-15  
CAAGTTCAGCGTGTCCGGCGAGGGCGAGGGCGATGC-----TGACCCTGAAGTTCATC -14  
CAAGTTCAGCGTGTCCGGCGAGGGCGAGGGCGATGCCAC-----AAGCTGACCCTGAAGTTCATC-7  
CAAGTTCAGCGTGTCCGGCGAGGGCGAGGGCGATA-----CGGCAAGCTGACCCTGAAGTTCATC-7  
CAAGTTCAGCGTGTCCGGCGAGGGCGAGGGCGATGC---TACGGCAAGCTGACCCTGAAGTTCATC-4  
CAAGTTCAGCGTGTCCGGCGAGGGCGAGGGCGATGCCACCT-CGGCAA-CTGACCCTGAAGTTCATC-2  
CAAGTTCAGCGTGTCCGGCGAGGGCGAGGGCGATGCCAC-TACGGCAAGCTGACCCTGAAGTTCATC-1

**sgGFP101-20nt sgRNA**

CAAGTTCAGCGTGTCCGGCGAGGGCGAGGGCGATGCCAC<sup>↓</sup>CTACGGCAAGCTGACCCTGAAGTTCATC wild-type  
CAAGTTCAGCGTGTCCGGCGAGGGCGA----->-189  
<-----CTACGGCAAGCTGACCCTGAAGTTCATC-47  
CAAGTTCAGCGTGTCCGGCG-----AGGGC-----GACCCTGAAGTTCATC-26(-6,-20)  
CAAGTTCAGCGTGTCCGG-----CGAGGGCGATG-----ACCCTGAAGTTCATC -23(-6,-17)  
CAAGTTCAGCGTGTCCGGCGAGGGC-----AAGCTGACCCTGAAGTTCATC -21  
CAAGTTCAGCGTGTCCGGCGAGGGCGAGGGC-----AAGCTGACCCTGAAGTTCATC-15  
CAAGTTCAGCGTGTCCGGCGAGGGCGAGGGCGATG-----GCAAGCTGACCCTGAAGTTCATC-9  
CAAGTTCAGCGTGTCCGGCGAGGGCGAGGGCGAT-----ACGGCAAGCTGACCCTGAAGTTCATC -7  
CAAGTTCAGCGTGTCCGGCGAGGGCGAGGGCGAT-----ACGGCAAGCTGACCCTGAAGTTCATC-7  
CAAGTTCAGCGTGTCCGGCGAGGGCGAGGGCGATGCCAC-TACGGCAAGCTGACCCTGAAGTTCATC-1

**sgGFP261- 17nt sgRNA**

TGAAGAAGATGGTGCCTCCTGGACGTAGCCTTCGGGCA<sup>↓</sup>TGGCGGACTTGAAGAAGTCGTGCTGCTT wild-type  
TGAAGAAGATGGTGCCTCCTGGACGTAGCCTTCG-----GGCGGACTTGAAGAAGTCGTGCTGCTT-5  
TGAAGAAGATGGTGCCTCCTGGACGTAGCCTT-----CATGGCGGACTTGAAGAAGTCGTGCTGCTT-4  
TGAAGAAGATGGTGCCTCCTGGACGTAGCCTTCGGGCAATGGCGGACTTGAAGAAGTCGTGCTGCT +1  
TGAAGAAGATGGTGCCTCCTGGACGTAGCCTTCGGGCAATGGCGGACTTGAAGAAGTCGTGCTGCT +1  
TGAAGAAGATGGTGCCTCCTGGACGTAGCCTTCGGGCAATGGCGGACTTGAAGAAGTCGTGCTGCT +1  
TGAAGAAGATGGTGCCTCCTGGACGTAGCCTTCGGGCAATGGCGGACTTGAAGAAGTCGTGCTGCT +1  
TGAAGAAGATGGTGCCTCCTGGACGTAGCCTTCGGGCAATGGCGGACTTGAAGAAGTCGTGCTGCT +1  
TGAAGAAGATGGTGCCTCCTGGACGTAGCCTTCGGGCA<sup>↓</sup>tactggaATGGCGGACTTGAAGAAGTCGT +7

**sgGFP261-20nt sgRNA**

TGAAGAAGATGGTGCCTCCTGGACGTAGCCTTCGGGCA<sup>↓</sup>TGGCGGACTTGAAGAAGTCGTGCTGCTT wild-type  
<-----GCGGACTTGAAGAAGTCGTGCTGCTT-106  
TGAAGAAGATGGTGCCTCCTGGACGTAGCCTTCGGGCA-----TT-27  
TGAAGAAGATGGTGCCTCCTGGACGTAGCCTTCGGGCA-----GCGGACTTGAAGAAGTCGTGCTGCTT -13  
TGAAGAAGATGGTGCCTCCTGGACGTAGCCTTCGGG-----CTTGAAGAAGTCGTGCTGCTT -9  
TGAAGAAGATGGTGCCTCCTGGACGTAGCCTTCG-----GGCGGACTTGAAGAAGTCGTGCTGCTT-5  
TGAAGAAGATGGTGCCTCCTGGACGTAGCCTTCG-----GGCGGACTTGAAGAAGTCGTGCTGCTT-5  
TGAAGAAGATGGTGCCTCCTGGACGTAGCCTTCGGGCA-GGCGGACTTGAAGAAGTCGTGCTGCTT-1  
TGAAGAAGATGGTGCCTCCTGGACGTAGCCTTCGGGCAATGGCGGACTTGAAGAAGTCGTGCTGCT +1  
TGAAGAAGATGGTGCCTCCTGGACGTAGCCTTCGGGCAATGGCGGACTTGAAGAAGTCGTGCTGCT +1  
TGAAGAAGATGGTGCCTCCTGGACGTAGCCTTCGGGCAATGGCGGACTTGAAGAAGTCGTGCTGCT +1

**sgGFP379- 17nt sgRNA**

CCCTGGTGAACCGCATCGAGCTGAAGGGGCA<sup>↓</sup>AGGAGGACGGCAACATCCTGGGGCACA wild-type  
CCCTGGTGAACCGCATCGAGCTGAAGGGCA-----ACATCCTGGGGCACA-21  
CCCTGGTGAACCGCATCG-----AGGAGGACGGCAACATCCTGGGGCACA-21  
CCCTGGTGAACCGCATCGAGCTGAAGGGGATCGACTTCAAGGA-----ATCCTGGGGCACA-10  
CCCTGGTGAACCGCATCGAGCTGAAGGGGATCGACTTCAAGGAGGACGGCAACATCCTGGGGCACA +1

CCCTGGTGAACCGCATCGAGCTGAAGGGCATCGACTTCAAGGAGGACGGCAACATCCTGGGGCACA +1  
 CCCTGGTGAACCGCATCGAGCTGAAGGGCATCGACTTCAAGGAGGACGGCAACATCCTGGGGCACA +1  
 CCCTGGTGAACCGCATCGAGCTGAAGGGCATCGACTTCAAAAGGAGGACGGCAACATCCTGGGGCACA +1  
 CCCTGGTGAACCGCATCGAGCTGAAGGGCATCGACTTCAggagggatcgacttcAGGAGGACGGCA +16

**sgGFP379-20nt sgRNA**

CCCTGGTGAACCGCATCGAGCTGAAGGGCATCGACTTCA<sup>1</sup>AGGAGGACGGCAACATCCTGGGGCACAA wild-type  
 <----->-291  
 CCCTGGTGAACCGCATCGAGCTGAAGGGCATCGAC----->-70  
 CCCTGGTGAACCGCATCGAGCTG-----AAGGAGGACG-----TCCTGGGGCACAA -21 (-15,-6)  
 CCCTGGTGAACCGCATCGAGCTGA-----AGGACGGCAACATCCTGGGGCACAA-18  
 CCCTGGTGAACCGCATCGAGCTG-----AAGGAGGACGGCAACATCCTGGGGCACAA-15  
 CCCTGGTGAACCGCATCGAGCTG-----AAGGAGGACGGCAACATCCTGGGGCACAA-15  
 CCCTGGTGAACCGCATCGAGCTG-----AAGGAGGACGGCAACATCCTGGGGCACAA-15  
 CCCTGGTGAACCGCATCGAGCTGAAGGGCATCGACTTC---AGGACGGCAACATCCTGGGGCACAA-4

**Supplementary Figure S1A. DNA sequences of indel mutations induced by 17nt vs. 20nt sgGFPs that target GFP sites 42, 101, 261 and 379 in 293T GFP reporter cells.**

## Supplementary Figure S1B

### iPSC

#### *sgGFP101- 17nt sgRNA*

CAAGTTCAGCGTGTCCGGCGAGGGCGAGGGCGATGCCAC<sup>↓</sup>CTACGGCAAGCTGACCCTGAAGTTCATC wild-type  
CAAGTTCAGCGTGTCCGGCGAGGGCGAGGGCGATGC-----TGACCCTGAAGTTCATC -14  
CAAGTTCAGCGTGTCCGGCGAGGGCGAGGGCGATGC-----TGACCCTGAAGTTCATC -14  
CAAGTTCAGCGTGTCCGGCGAGGGCGAGGGCGATGC-----AAGCTGACCCTGAAGTTCATC -10  
CAAGTTCAGCGTGTCCGGCGAGGGCGAGGGCGATGCCAC--ACGGCAAGCTGACCCTGAAGTTCATC -2  
CAAGTTCAGCGTGTCCGGCGAGGGCGAGGGCGATGCCAC-TACGGCAAGCTGACCCTGAAGTTCATC -1  
CAAGTTCAGCGTGTCCGGCGAGGGCGAGGGCGATGCCACC<sup>↓</sup>TACGGCAAGCTGACCCTGAAGTTCAT +1

#### *sgGFP101-20nt sgRNA*

CAAGTTCAGCGTGTCCGGCGAGGGCGAGGGCGATGCCAC<sup>↓</sup>CTACGGCAAGCTGACCCTGAAGTTCATC wild-type  
-----AAGCTGACCCTGAAGTTCATC -60  
CAAGTTCAGCGTGTCCGGCGAGGGCGAGGGCGATGCC-----CTGAAGTTCATC -18  
CAAGTTCAGCGTGTCCGGCGAGGGCGAGGGCGATGC-----TGACCCTGAAGTTCATC -14  
CAAGTTCAGCGTGTCCGGCGAGGGCGAGGGCGATGCCACC-----AAGCTGACCCTGAAGTTCATC -6  
CAAGTTCAGCGTGTCCGGCGAGGGCGAGGGCGATGCCAC----GGCAAGCTGACCCTGAAGTTCATC -4  
CAAGTTCAGCGTGTCCGGCGAGGGCGAGGGCGATGCCAC-TACGGCAAGCTGACCCTGAAGTTCATC -1  
CAAGTTCAGCGTGTCCGGCGAGGGCGAGGGCGATGCCACC<sup>↓</sup>gatCTACGGCAAGCTGACCCTGAAGTT +4

#### *sgGFP379- 17nt sgRNA*

CCCTGGTGAACCGCATCGAGCTGAAGGGGCATCGACTTCA<sup>↓</sup>AGGAGGACGGCAACATCCTGGGGCACAA wild-type  
CCCTGGTGAACCGCATCGAGCTGAAGGGGCATCGACTGAgcTgAAGGAGGACGGCAACATCCTGGGGCACAA mutation  
CCCTGGTGAACCGCATCGAGCTGAAGGGGCATCGACTTcaAAGGAGGACGGCAACATCCTGGGGCACAA +1  
CCCTGGTGAACCGCATCGAGCTGAAGGGGCATCGACTTcaAAGGAGGACGGCAACATCCTGGGGCACAA +1  
CCCTGGTGAACCGCATCGAGCTGAAGGGGCATCGACTTcaAAGGAGGACGGCAACATCCTGGGGCACAA +1  
CCCTGGTGAACCGCATCGAGCTGAAGGGGCATCGACTTcaAAGGAGGACGGCAACATCCTGGGGCACAA +1

#### *sgGFP379-20nt sgRNA*

CCCTGGTGAACCGCATCGAGCTGAAGGGGCATCGACTTCA<sup>↓</sup>AGGAGGACGGCAACATCCTGGGGCACAA wild-type  
CCCTGGTGAACCGCATCGAGCT-----GAGGACGGCAACATCCTGGGGCACAA -19  
CCCTGGTGAACCGCATCGAGCTGAAGGGGCATCGACT-----TCCTGGGGCACAA -18  
CCCTGGTGAACCGCATCGAGCTG-----AAGGAGGACGGCAACATCCTGGGGCACAA -15  
CCCTGGTGAACCGCATCGAGCTGAAGGGCA----TCAAGGAGGACGGCAACATCCTGGGGCACAA -6  
CCCTGGTGAACCGCATCGAGCTGAAGGGGCATCGACTTC-AGGAGGACGGCAACATCCTGGGGCACAA -1  
CCCTGGTGAACCGCATCGAGCTGAAGGGGCATCGACTTcaAAGGAGGACGGCAACATCCTGGGGCACAA +1  
CCCTGGTGAACCGCATCGAGCTGAAGGGGCATCGACTTcagcgcaaggacggcaagGACTTCAAGGAGGACGG +18

**Supplementary Figure S1B. DNA sequences of indel mutations induced by 17nt vs. 20nt sgGFPs that target GFP sites 42, 101, 261 and 379 in iPSCGFP reporter cells.**

## Supplementary Figure S2

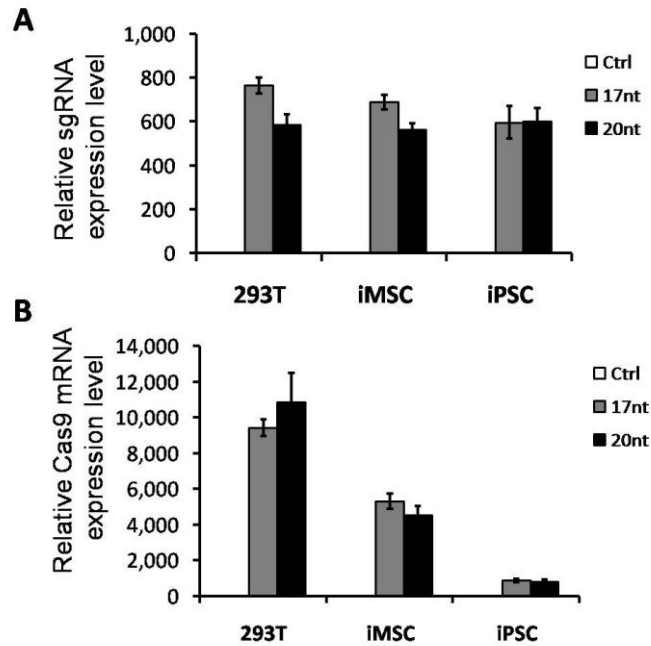

**Supplementary Figure S2. Relative expression of 17nt vs. 20nt sgRNA and Cas9 in transduced 293T cells, iMSCs and iPSC.** 293T, iPSC and iMSC cells were transduced with Lenti-U6-sgCD73a-SFFV-Cas9-2A-Puro vectors at an MOI of 1 in the presence of 8  $\mu\text{g/ml}$  protamine sulfate. Two days after transduction, cells were treated with 0.5-1  $\mu\text{g/ml}$  puromycin. At 10 days following puromycin selection, cells were harvested by treating with Accutase. Total RNA was extracted using miRCURY RNA Isolation Kit (EXIQON). Reverse transcription was performed using the EasyScript Plus cDNA Synthesis Kit (ABM), following the manufacturer's instructions.

## Supplementary Figure S3

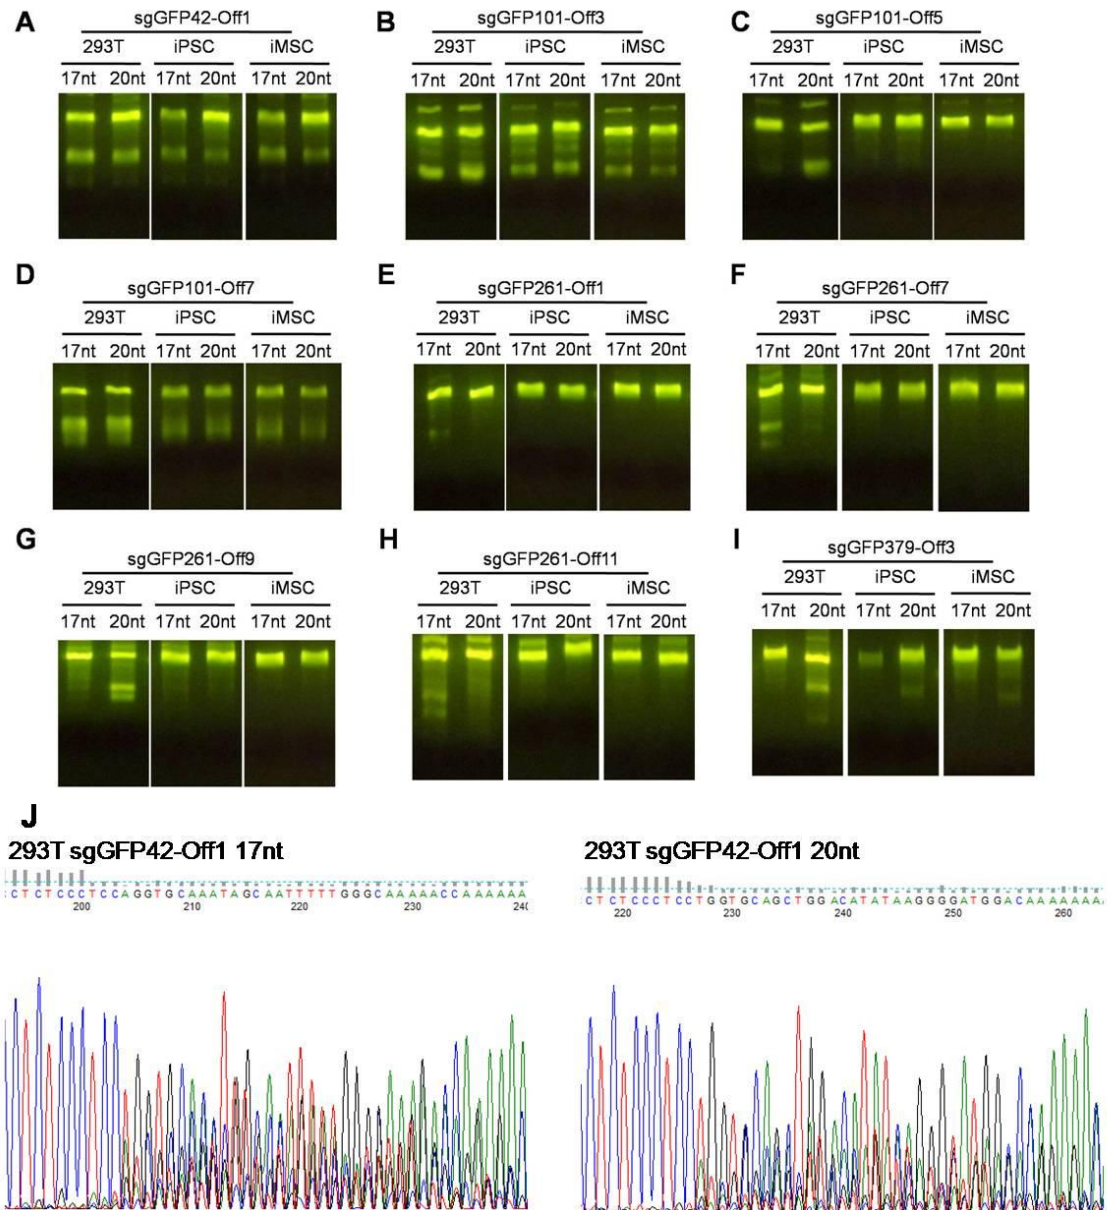

**Supplementary Figure S3. Detection of off-targets by T7E1 mismatch nucleotide cleavage assay and DNA sequencing.** Gel pictures of off-target amplicons after T7E1 digestion (A-I) and representative histograms of off-target amplicon sequencing (J) are shown.

**Table S1. PCR primers used in this study**

| Name           | Forward Primer             | Reverse Primer        |
|----------------|----------------------------|-----------------------|
| GFP            | CAGGTGTCGTGAGCGATCGCC      | GAACTCCAGCAGGACCATGT  |
| sgGFP42-Off1   | CCCAGTGACATTGCCCTCTT       | CCAGGCTGCTGCTCATCATA  |
| sgGFP42-Off2   | ATGGCCAGGCTTCAGTACAC       | AGGGTGGGAAGGAAAGGAGA  |
| sgGFP42-Off4   | GGGAGTTCGTCCTTTCTGCA       | GGTCCCAGGGGAGTTTTTCC  |
| sgGFP42-Off5   | AAGCCTTCCAGAACAGCCTC       | TGTTCTCAGACGTGGACAGC  |
| sgGFP42-Off6   | CCTTTCTCCTGCCCATCTGG       | CCACTGTACCACGCTGTCTT  |
| sgGFP42-Off7   | CCCAGGCTGCAACATTTGAC       | TGACTTGCTAAGAGGGCAGG  |
| sgGFP42-Off9   | CTCCAGGACCTGCCAAAGAG       | GCCTCCAGGGTTAAGAGCAG  |
| sgGFP42-Off10  | ACAGCCCTTGTGTCATCCTC       | CTCACTCTGTGCCAGTCCTG  |
| sgGFP42-Off11  | CAGTGTGGAACCTCGCCTTCT      | GAAGCTGAGCCAAGCCCTAA  |
| sgGFP42-Off12  | CACCTTGGGGGAAGACTGAC       | GGCCCTTCTTCTTTTGCTT   |
| sgGFP42-Off13  | CAGAACCCCTGGACACTGAC       | CTCTATGACCACTTGCAGCA  |
| sgGFP42-Off14  | CCTGATAGGGAAGCAAGGCC       | GCAAATAAGGGGTGGAGGCT  |
| sgGFP42-Off15  | GGGTCAGGCCAGGTCTAAAC       | TCCTGCCTCACAGCCTATCT  |
| sgGFP42-Off16  | TGGAACCTGGGGCTCAAATCC      | CTGGGGACAATGAGGCTGAG  |
| sgGFP101-Off1  | GGGTGGAAGAAAGCACGGTA       | CCCCCATTCATCCAGGTCAG  |
| sgGFP101-Off2  | AAGTCTTGGGGCTTTGAGG        | AGAACACCCGATTCAGCCTG  |
| sgGFP101-Off3  | ACTAAGGTACCAGCCAAACACA     | GGGTGAGAGCCAAGGAAACA  |
| sgGFP101-Off4  | ACACATGTTCTTGCACGTGC       | CTGCCTCACTCTTCTGGCTC  |
| sgGFP101-Off5  | TCGGCACTTTGATGAGCACT       | GGTTCACCAAGCTCAGGGTT  |
| sgGFP101-Off6  | GGATCGCTACAACCCAGGAG       | TGCGCTCAAACCATCTTCTT  |
| sgGFP101-Off7  | GCCAACCTGGAGAAGTGGA        | ACTCCCATCCTGACTAGTGCT |
| sgGFP261-Off1  | AGACCACAATTCCCGGCATT       | CGAACGGGTTCCAGAGTTCT  |
| sgGFP261-Off3  | TGTGAGCCCCTCAGAGAGAG       | ATGGATCCTCCCCCTCTCAC  |
| sgGFP261-Off4  | CAGCTCCATGACCTACTGCC       | GTGCCCTACCTCACATTCC   |
| sgGFP261-Off5  | CAAGTCCCCGCTCATCTCAG       | AGACCCGGCTCCCTCTATTT  |
| sgGFP261-Off6  | GCCTTCTTCGGACCTTACACA      | CCTGCAGTAGACTCCCTTGC  |
| sgGFP261-Off7  | AGGCTCCCTACTCTGTCTG        | ACCGTTTGTTGCTTGTATGCA |
| sgGFP261-Off9  | CAGCACCTCCTTCCCTTCTG       | CCTCAGCCTCCTCCCTTAGT  |
| sgGFP261-Off10 | GGCCACGCGTAGGAATTAGA       | TCTTCCACAGGGGCAACATC  |
| sgGFP261-Off11 | GCACACGGTGTACATCAAC        | CCCAGAAATCCCACCCCATC  |
| sgGFP379-Off3  | CGGCCAAGTGGTCAGTTTTT       | AGATGGGCCAACTTCTCAGC  |
| sgRNA-qPCR     | AGCTAGAAATAGCAAGTTAAATAAGG | GACTCGGTGCCACTTTTTTCA |
| Cas9-qPCR      | CCGAAGAGGTCGTGAAGAAG       | GCCTTATCCAGTTCGCTCAG  |
| GAPDH-qPCR     | GTGGACCTGACCTGCCGTCT       | GGAGGAGTGGGTGTCGCTGT  |
